# Supplementary material for: Helping Peer Specialists Succeed: Lessons from a Statewide Training Program
Source: Research Square preprint supplement (doi:10.21203/rs.3.rs-9569288/v1), 2026-05-09
Supplement: Supplementary file 1 [file 11220553c37e8917baea2e71.docx]

**Table 1: Analyses Performed Listed by Data Source**

| Analysis | Data Source | Outcome | Covariates | Analytical Sample Size | Descriptive Statistics |
| --- | --- | --- | --- | --- | --- |
| 1 | Enrolled-student data | Graduated or Discontinued | Race + Age + Ethnicity + Gender + Any post-secondary education + Target field + Percent of terms employed + Ever employed as a peer specialist + Ever received accommodation supports + Proportion of terms with financial supports + Proportion of terms with service supports + Proportion of terms with tangible supports + Any leave of absence + Institution | Ngraduated=356  Ndiscontinued=326 | Table 2 |
| 2 | Enrolled-student data, grant reporting data, IPEDS data | Graduation Rate (binomial model) | Public/Private Non-Profit Ownership + Urban/Suburban Setting + Dollars Allocated per Enrolled Student-Term | Ninstitutions=10 | Figure 2 |
| 3 | Post-graduate survey | Any Lifetime Certification Exam Attempt | Total unique supports used + Months since graduation + White race + Age | NYes=79  NNo=91 | Table 3 |
| 4 | Post-graduate survey | Passing Certification Exam (among attempters) | Total unique supports used + Months between graduation and exam + White race + Age | NPass=60  NFail=18 | Table 3 |

**Table 2: Characteristics of CRSS Success Program Students**

| **Variable** | **Overall** | **Graduated** | **Discontinued** | **Currently Enrolled** | **On Leave** | **p-value**3 | **p-value**4 |
| --- | --- | --- | --- | --- | --- | --- | --- |
| N = 1,1641,2 (100%) | N = 387 (33.25%) | N = 363 (31.19%) | N = 382 (32.82%) | N = 32 (2.75%) |
| **Age at entry (years)** | 41.239 (13.197) | 40.033 (13.756) | 41.611 (12.911) | 42.346 (12.781) | 37.313 (13.653) | 0.017 | 0.031 |
| Missing | 29 | 2 | 27 | 0 | 0 |  |  |
| **Race** |  |  |  |  |  | 0.369 | 0.686 |
| Black | 296 (25.78%) | 81 (22.95%) | 105 (27.70%) | 103 (26.82%) | 7 |  |  |
| White | 713 (62.11%) | 223 (63.17%) | 233 (61.48%) | 237 (61.72%) | 20 |  |  |
| Other | 139 (12.11%) | 49 (13.88%) | 41 (10.82%) | 44 (11.46%) | ≤55 |  |  |
| Missing | 16 | 10 | 3 | 3 | 0 |  |  |
| **Latino/Hispanic** | 187 (16.29%) | 63 (17.95%) | 69 (18.16%) | 50 (12.99%) | 5 (15.63%) | 0.068 | 0.177 |
| Missing | 16 | 12 | 2 | 2 | 0 |  |  |
| **Gender identity** |  |  |  |  |  | 0.557 | 0.476 |
| Woman | 731 (63.45%) | 229 (63.43%) | 228 (60.32%) | 255 (66.93%) | 19 (59.38%) |  |  |
| Man | 393 (34.11%) | 123 (34.07%) | 138 (36.51%) | 119 (31.23%) | 13 (40.63%) |  |  |
| Gender Diverse | 28 (2.43%) | 9 (2.49%) | 12 (3.17%) | 7 (1.84%) | 0 (0.00%) |  |  |
| Missing | 12 | 2 | 4 | 6 | 0 |  |  |
| **Any post-secondary education** | 717 (62.40%) | 212 (58.89%) | 235 (62.17%) | 256 (67.55%) | 14 (43.75%) | 0.016 | 0.017 |
| Missing | 15 | 3 | 4 | 8 | 0 |  |  |
| **Desired field of practice** |  |  |  |  |  | 0.002 | 0.006 |
| Mental Health | 179 (16.18%) | 59 (17.66%) | 66 (17.84%) | 50 (13.51%) | ≤5 |  |  |
| Substance Use Disorder | 137 (12.39%) | 29 (8.68%) | 55 (14.86%) | 49 (13.24%) | ≤5 |  |  |
| Both | 528 (47.74%) | 149 (44.61%) | 162 (43.78%) | 197 (53.24%) | ≤5 |  |  |
| Unsure | 262 (23.69%) | 97 (29.04%) | 87 (23.51%) | 74 (20.00%) | ≤5 |  |  |
| Missing | 58 | 29 | 12 | 17 | 0 |  |  |
| **Year first enrolled** |  |  |  |  |  | 0.018 | 0.000 |
| 2021 | 8 (0.69%) | 7 (1.93%) | 0 | ≤5 | 0 |  |  |
| 2022 | 223 (19.17%) | 95 (26.17%) | 14 (3.66%) | 109 (28.24%) | ≤5 |  |  |
| 2023 | 432 (37.15%) | 169 (46.56%) | 80 (20.94%) | 176 (45.60%) | 7 (21.88%) |  |  |
| 2024 | 426 (36.63%) | 84 (23.14%) | 230 (60.21%) | 99 (25.65%) | 13 (40.63%) |  |  |
| 2025 | 74 (6.36%) | 8 (2.20%) | 58 (15.18%) | ≤5 | 7 (21.88%) |  |  |
| **Proportion of enrolled terms employed anywhere** | 0.399 (0.462) | 0.333 (0.463) | 0.392 (0.469) | 0.464 (0.444) | 0.427 (0.486) | <0.001 | 0.002 |
| **Among those with employed terms, proportion employed as a CRSS** | 0.473 (0.481) | 0.209 (0.406) | 0.401 (0.475) | 0.678 (0.436) | 0.354 (0.479) | <0.001 | <0.001 |
| Zero employed terms | 622 | 236 | 214 | 156 | 16 |  |  |
| **Ever on leave of absence** | 171 (14.69%) | 78 (21.49%) | 22 (5.76%) | 39 (10.08%) | 32 (100.00%) | <0.001 | <0.001 |
| **Ever received academic accommodation** | 33 (2.84%) | 7 (1.93%) | 11 (2.88%) | 15 (3.88%) | ≤5 | 0.143 | 0.308 |
| **Proportion of terms with tangible support** | 0.449 (0.458) | 0.314 (0.452) | 0.535 (0.464) | 0.482 (0.425) | 0.547 (0.494) | <0.001 | <0.001 |
| **Proportion of terms with financial support** | 0.508 (0.460) | 0.312 (0.444) | 0.651 (0.445) | 0.548 (0.422) | 0.549 (0.492) | <0.001 | <0.001 |
| **Proportion of terms with services support** | 0.393 (0.454) | 0.380 (0.462) | 0.434 (0.456) | 0.345 (0.438) | 0.616 (0.445) | 0.287 | 0.001 |
| 1Individuals whose most recent observation occurred prior to Spring 2024 and who completed more than two courses and 300 internship hours were considered to have been graduated (N = 99) and simply not marked. These were not considered imputations. Those with less than 300 and ≥200 internship hours and two or more courses were classified as graduated and imputed (N = 6). Individuals with ≤100 internship hours were classified as discontinued and imputed (N = 27). Participants meeting neither criterion were classified as lost to follow-up and excluded from this table (N = 8).  2Individuals from Institution 12 (N = 51) were excluded from this table, as well as Analysis 1, due unclear categorization of individuals and data quality concerns.  3Two-way comparison between Graduated and Discontinued students; continuous variables used a two-sample t-test, and categorical variables used a χ2 test of independence.  4Four-way comparison between all groups; continuous variables used one-way anova, and categorical variables used a χ2 test of independence.  5Counts less than 5 are hidden to protect participant identity | | | | | | | |

**Table 3: Characteristics of CRSS Success Program Graduate-Survey Takers**

| **Variable** | **Overall** | **No Exam Attempt** | **Attempted Exam** | | **p-value** |
| --- | --- | --- | --- | --- | --- |
| N = 171 | N = 92 | N = 79 | |
| **Total supports received during CRSS Success Program, mean (SD)** | 4.14 (2.69) | 3.39 (2.39) | 5.01 (2.76) | | <.001 |
| **Months since graduation, mean (SD)** | 11.28 (4.08) | 10.37 (3.12) | 12.35 (4.77) | | <.001 |
| **Race: white (Yes), n (%)** | 94 (54.97%) | 40 (43.48%) | 54 (68.35%) | | <.001 |
| **Age** |  |  |  | |  |
| 18–24 | 37 (21.76%) | 13 (14.29%) | 24 (30.38%) | | 0.090 |
| 25–34 | 47 (27.65%) | 27 (29.67%) | 20 (25.32%) | |  |
| 35–44 | 37 (21.76%) | 22 (24.18%) | 15 (18.99%) | |
| 45+ | 49 (28.82%) | 29 (31.87%) | 20 (25.32%) | |
| Missing | 1 | 1 | 0 | |
| **Currently employed in a CRSS/CPRS role** | 103 (60.23%) | 41 (44.56%) | 62 (78.48%) | | <.001 |
| **Overall, among exam takers only (n = 79)** | | | **Passed** | **Failed** |  |
| n = 61 | n = 18 |  |
| **Total supports received during CRSS Success Program, mean (SD)** | 5.01 (2.76) | | 5.21 (2.74) | 4.33 (2.79) | .24 |
| **Months from graduation to exam, mean (SD)** | 6.60 (4.83) | | 5.64 (3.65) | 9.80 (6.72) | <.001 |
| Missing | 1 | | 1 | 0 |  |
| **Race: white (Yes), n (%)** | 54 (68.35%) | | 47 (77.05%) | 7 (38.89%) | 0.002 |
| **Age 45+ (vs 44 or less), n (%)** | 35 (44.30%) | | 23 (37.70%) | 12 (66.67%) | 0.03 |
| **Currently employed in a CRSS/CPRS role** | 62 (78.48%) | | 48 (78.69%) | 14 (77.78%) | .93 |

CPRS = Certified Peer Recovery Specialist; CRSS = Certified Recovery Support Specialist; Percentages represent column-wise values
