# Supplementary material for: Helping Peer Specialists Succeed: Lessons from a Statewide Training Program
Source: Research Square preprint supplement (doi:10.21203/rs.3.rs-9569288/v1), 2026-05-09
Supplement: Supplementary file 2 [file c6a3d9c97bf1c43c09d711ee.docx]

**Enrolled-Student Data Cleaning**

Support Variable Groupings

The original dataset had several binary support variables and five “other” columns in which administrators could list supports that students received that term that were not covered by one of the existing variables. Every free-text entry was mapped to an existing support variable, or a new one was created to capture it. Then, these binary support indicators were mapped into groups alongside other similar supports. These groups and the variables within them are listed in **Supplemental Table S1**.

**Supplemental Table S1: Support Variable Groupings and Free-Text Mapping**

| **Support Group** | **Definition** | **Binary indicator variables included in group** | **Example “Other” free‑text entries mapped into this group** |
| --- | --- | --- | --- |
| Tangible | Physical/material resources enabling participation | - Technology needed for program participation (laptops, tablets, hotspots) - Clothing or gear required for internships or practical training | - Technology: “loaner laptop,” “wifi support,” “headphones,” “computer, hot spot, and other course supplies” - Clothing/gear: internship clothing or supplies |
| Financial | Direct cash payments | - Internship stipends - Cash assistance for food - Cash assistance for housing - Cash assistance for transportation - Cash assistance for childcare - Cash assistance for health needs - Other direct cash payments | - Stipends: “$15/hr,” “$2400 total stipend” - Food assistance: “meal card,” “groceries” - Housing assistance: “$1200 for living expenses” - Transportation‑related payments: “$900 for car expenses,” “ventra passes” - Childcare costs: “$900 for childcare” - Healthcare expenses: “health related costs” - Other direct cash payments: “$600 for extenuating circumstances” |
| Services | Services/interventions provided (not cash, not tangible goods) | - Legal help for issues affecting employment (e.g., criminal history, citizenship) - Additional training, coaching, or skill‑building - Counseling or mental health support | - Legal support: “legal assistance” - Training/coaching: “success coach,” “professional development trainings” - Counseling/mental health support: “wellness center counseling,” “grief support” |
| Accommodations | Academic/structural accommodations (not clinical counseling) | - Language support - ADA‑related accommodations - Flexibility for absences or schedule adjustments | - Language support: “ESL tutoring” - ADA accommodations: “extended internship due to disability hours,” “medical extension” - Absences/flexibility: “excused from opening day due to family illness” |

Internship Hour Calculation

Different records used different total internship hour calculations. The method by which this was deciphered is shown below in **Supplemental Table S2**. The correct method was then used to calculate the total internship hours.

**Supplemental Table S2: Method for Determining how Internship Hours Were Calculated**

| **Reporting pattern classification** | **Empirical pattern observed across terms** | **Internship Reporting Classification label** | **Method used to derive total internship hours** | **N** |
| --- | --- | --- | --- | --- |
| Graduation override | Participant is recorded as having graduated in any term | Graduated | Total internship hours set to 300, reflecting program completion requirements | 387 |
| No recorded internship activity | All recorded values are 0 or missing across all observed terms | No hours recorded | Total internship hours set to 0 | 525 |
| Cumulative reporting | Internship hours sum to over the maximum value (300), or there is only a single value reported for a student | Cumulative | Total internship hours equals the maximum positive value recorded | 232 |
| Per-term reporting | Internship hours decrease between consecutive terms or drop from a positive value to zero in a later term | Per-term | Total internship hours equal the sum of all positive values recorded across terms | 9 |
| Ambiguous reporting | Reporting does not meet any of the criteria above | Ambiguous | Total internship hours estimated as the largest recorded value plus one-half of the second-largest value | 11 |

Terminal Status Adjudication

Total internship hours were used to adjudicate terminal training status for individuals with incomplete records. An incomplete record was defined as a student whose final observed term occurred in or before Spring 2024 without a recorded graduation, discontinuation, or leave of absence. Terminal status was assigned using prespecified rules described in **Supplemental Table S3.**

**Supplemental Table S3: Terminal Status Adjudication**

| **Population evaluated** | **Decision rule** | **Final status assigned** | **Treatment in analyses** | **N** |
| --- | --- | --- | --- | --- |
| Corrected graduation (assumed to be an administrative accidental omission) | Participant completed ≥300 internship hours and passed ≥2 courses; | Graduated | Treated as observed (not imputed) | 99 |
| Imputed graduation | Participant completed 200–299 internship hours and passed ≥2 courses | Graduated | Flagged as imputed graduation | 6 |
| Imputed discontinuation | Participant completed ≤100 internship hours | Discontinued | Flagged as imputed discontinuation | 27 |
| Lost to follow-up | Participant did not meet criteria above | Lost to follow-up | Excluded from graduation/discontinuation analyses | 8 |

Leave-of-Absence Construction

Administrative records were reported by term, but the start date of terms varied and leave-of-absence (LOA) indicators were inconsistently recorded. This table documents the rules used to standardize terms and identify gaps in enrollment.

**Supplemental Table S3c: Construction of Standardized Academic Terms and Identification of Unmarked Leaves-of-Absence**

| **Component** | **Rule** | **Output** |
| --- | --- | --- |
| Term season assignment | Term start dates were mapped to seasons using calendar months: January–April = Spring; May–July = Summer; August–December = Fall. | Standardized season label (Spring/Summer/Fall) |
| Standardized term identifier | Season label was concatenated with calendar year (e.g., “Fall 2023”). | Standardized term-year identifier |
| Definition of “required” term sequence | To evaluate continuity of enrollment, Spring and Fall were treated as required sequential terms; Summer was treated as non-required (i.e., gaps were assessed ignoring Summer). | Term sequence index used for gap detection |
| Detection of enrollment gaps | Within each participant, consecutive observed terms were ordered chronologically. A gap was flagged, and a leave-of-absence was marked, when more than one required term elapsed between consecutive observed terms (ignoring Summer). | Gap indicator between observed terms |

Additional Cleaning Steps for Enrolled-Student Data

Inconsistent status fields were reconciled, and longitudinal student records were reconstructed by repairing term dates, consolidating duplicate or intra-term entries, and retaining the most complete in-program information while removing redundant and post-program administrative updates. Standardized academic term definitions were applied, unmarked leaves of absence were inferred from gaps in enrollment, and implausible or repetitive reporting patterns were flagged.

**Analytical Technique**

Missingness Analysis

Missingness analysis was performed for all logistic regressions. Pictured in **Supplemental Table S4** is the missingness table for Analysis 1. Only variables with at least one missing observation are shown. The only variable with significant (p<.05) missingness was Ethnicity in Analysis 1, which was more likely to be missing among discontinuers (12 of 362) compared to graduates (2 of 387). Due to low overall missingness (less than 2% of the sample), and stability of the direction and magnitude effect of this variable across model specifications, complete case analysis was retained. Analyses 3 and 4 had no missing data.

**Supplemental Table S4: Missingness for the Analysis 1 Sample**

| **Variable** | **Missing – Graduated (N=387)** | **Missing – Discontinued (N=363)** | **Missing Total (N=750)** | **p‑value** |
| --- | --- | --- | --- | --- |
| Race | 3 (0.78%) | 10 (2.75%) | 13 (1.73%) | 0.072 |
| Age | 0 (0.00%) | 2 (0.55%) | 2 (0.27%) | 0.451 |
| Ethnicity | 2 (0.52%) | 12 (3.31%) | 14 (1.87%) | 0.011* |
| Gender | 6 (1.55%) | 2 (0.55%) | 8 (1.07%) | 0.331 |
| Any Post-secondary Education | 8 (2.07%) | 3 (0.83%) | 11 (1.47%) | 0.270 |
| Target Field | 17 (4.39%) | 29 (7.99%) | 46 (6.13%) | 0.056 |

Model Specification and Functional Form Testing

Model specifications were compared using Akaike’s Information Criterion (AIC) when alternative operationalizations were evaluated within the same analytic sample, and the lowest-AIC model was selected. Functional form was assessed for continuous predictors by testing logarithmic transformations when appropriate.

Robustness Tests

As a robustness check, heteroskedastic probit models were estimated for analyses with sufficient sample size (Analyses 1 and 3). Evidence of heteroskedasticity was detected in Analysis 1; however, coefficient direction and magnitude were highly consistent with the primary logistic regression model, and substantive conclusions were unchanged. Accordingly, results from the logistic models with robust standard errors are reported. Given the small number of institutions, leave-one-out analyses were conducted for institution-level model in Analysis 2 to assess coefficient stability. Model discrimination for logistic regressions was evaluated using the area under the receiver operating characteristic curve (AUC). For all logistic models, split-sample validation was performed, and calibration was assessed using observed versus predicted probabilities. Lastly, clustered standard errors were not used in these analyses due to an insufficient number of institutions upon which to cluster.1

**Supplement References**

1. Colin Cameron A, Miller DL. A Practitioner’s Guide to Cluster-Robust Inference. *J Human Resources*. 2015;50(2):317-372. doi:10.3368/jhr.50.2.317
